# Supplementary material for: Sonophotocatalytic treatment of Bismarck Brown G dye and real textile effluent using synthesized novel Fe(0)-doped TiO2 catalyst
Source: Royal Society of Chemistry journal article supplement (doi:10.1039/c4ra07685k), 2014-12-15
Supplement: c4ra07685k1.pdf [file c4ra07685k1.pdf]

**Supplimentary file**

**The X-ray photoelectron spectrometer of the Fe doped TiO<sub>2</sub>**

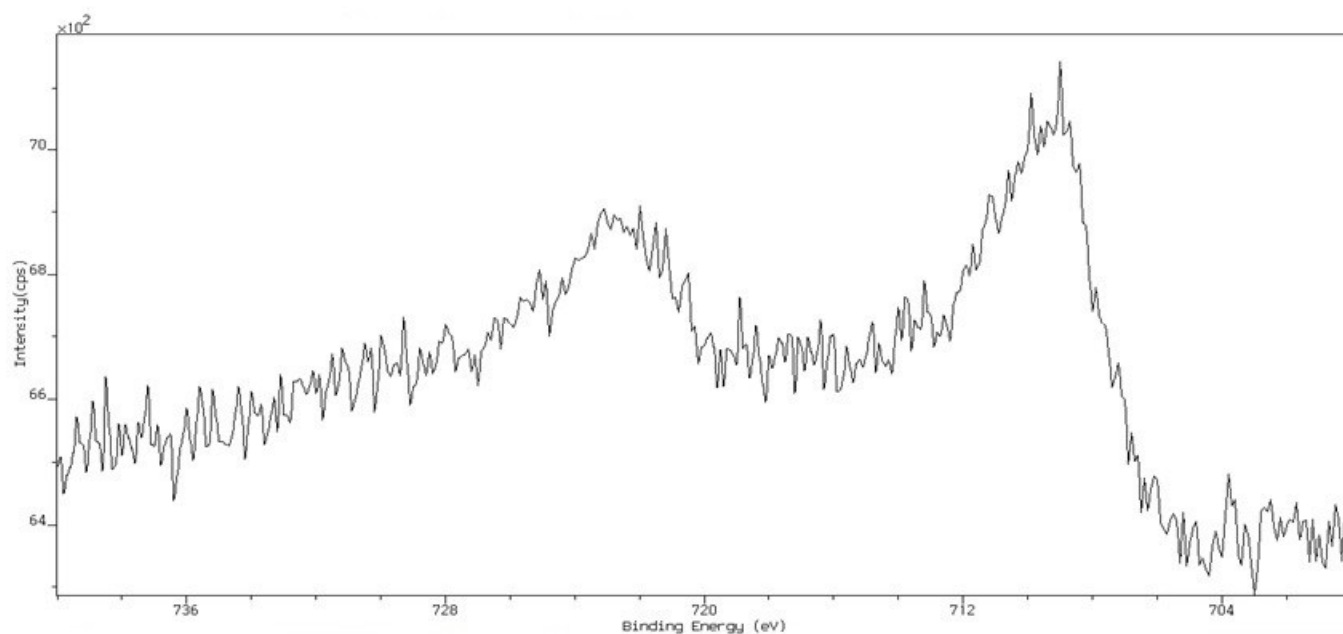

**Figure 1.** XPS of Fe-TiO<sub>2</sub> - Fe 2p
